# Supplementary material
Source: publisher site journal article supplement (https://www.dovepress.com/article/124054)
Supplement: Supplementary file 1 [file get_supplementary_file.php]

Supplementary material

## **Assessment of channelling bias among initiators of glucose lowering drugs - A UK cohort study**

### ***Authors***

On behalf of GetReal Work Package 2

Mikkel Z Ankarfeldt<sup>1, 2\*</sup>

Brian L Thorsted<sup>1</sup>

Erpur Adalsteinsson<sup>1</sup>

M Sanni Ali<sup>2, 3, 4</sup>

Rolf H H Groenwold<sup>2, 3</sup>

Olaf H Klungel<sup>2, 3</sup>

<sup>1</sup> Novo Nordisk A/S

<sup>2</sup> Julius Center for Health Sciences and Primary Care, University Medical Center Utrecht, Utrecht, The Netherlands

<sup>3</sup> Division of Pharmacoepidemiology and Clinical Pharmacology, Utrecht Institute for Pharmaceutical Sciences, University of Utrecht, Utrecht, Netherlands

<sup>4</sup> Nuffield Department of Orthopaedics, Rheumatology, Musculoskeletal Sciences, University of Oxford, Oxford, UK

\*Corresponding author. Clinical Research Centre, Copenhagen University Hospital, Hvidovre, Department 056, Kettegård Allé 30, 2650 Hvidovre, Denmark. Tel +45 38623350  
mikkelza@gmail.com

### **In the supplementary material the following can be found**

- **Figure S1** Flow chart.
- **Figure S2** Histograms of propensity score over time. GLP-1 versus basal insulin and DPP-4i versus sulfonylurea. Intention-to-treat and per-protocol cohorts.
- **Figure S3** Characteristics over time in GLP-1 versus basal insulin. Individual covariates.
- **Figure S4** Characteristics over time in DPP-4i versus sulfonylurea. Individual covariates.
- **Table S1** Standardized difference before and after matching in GLP-1 versus basal insulin
- **Table S2** Standardized difference before and after matching DPP-4i versus sulfonylurea

**Figure S1** Flow chart.

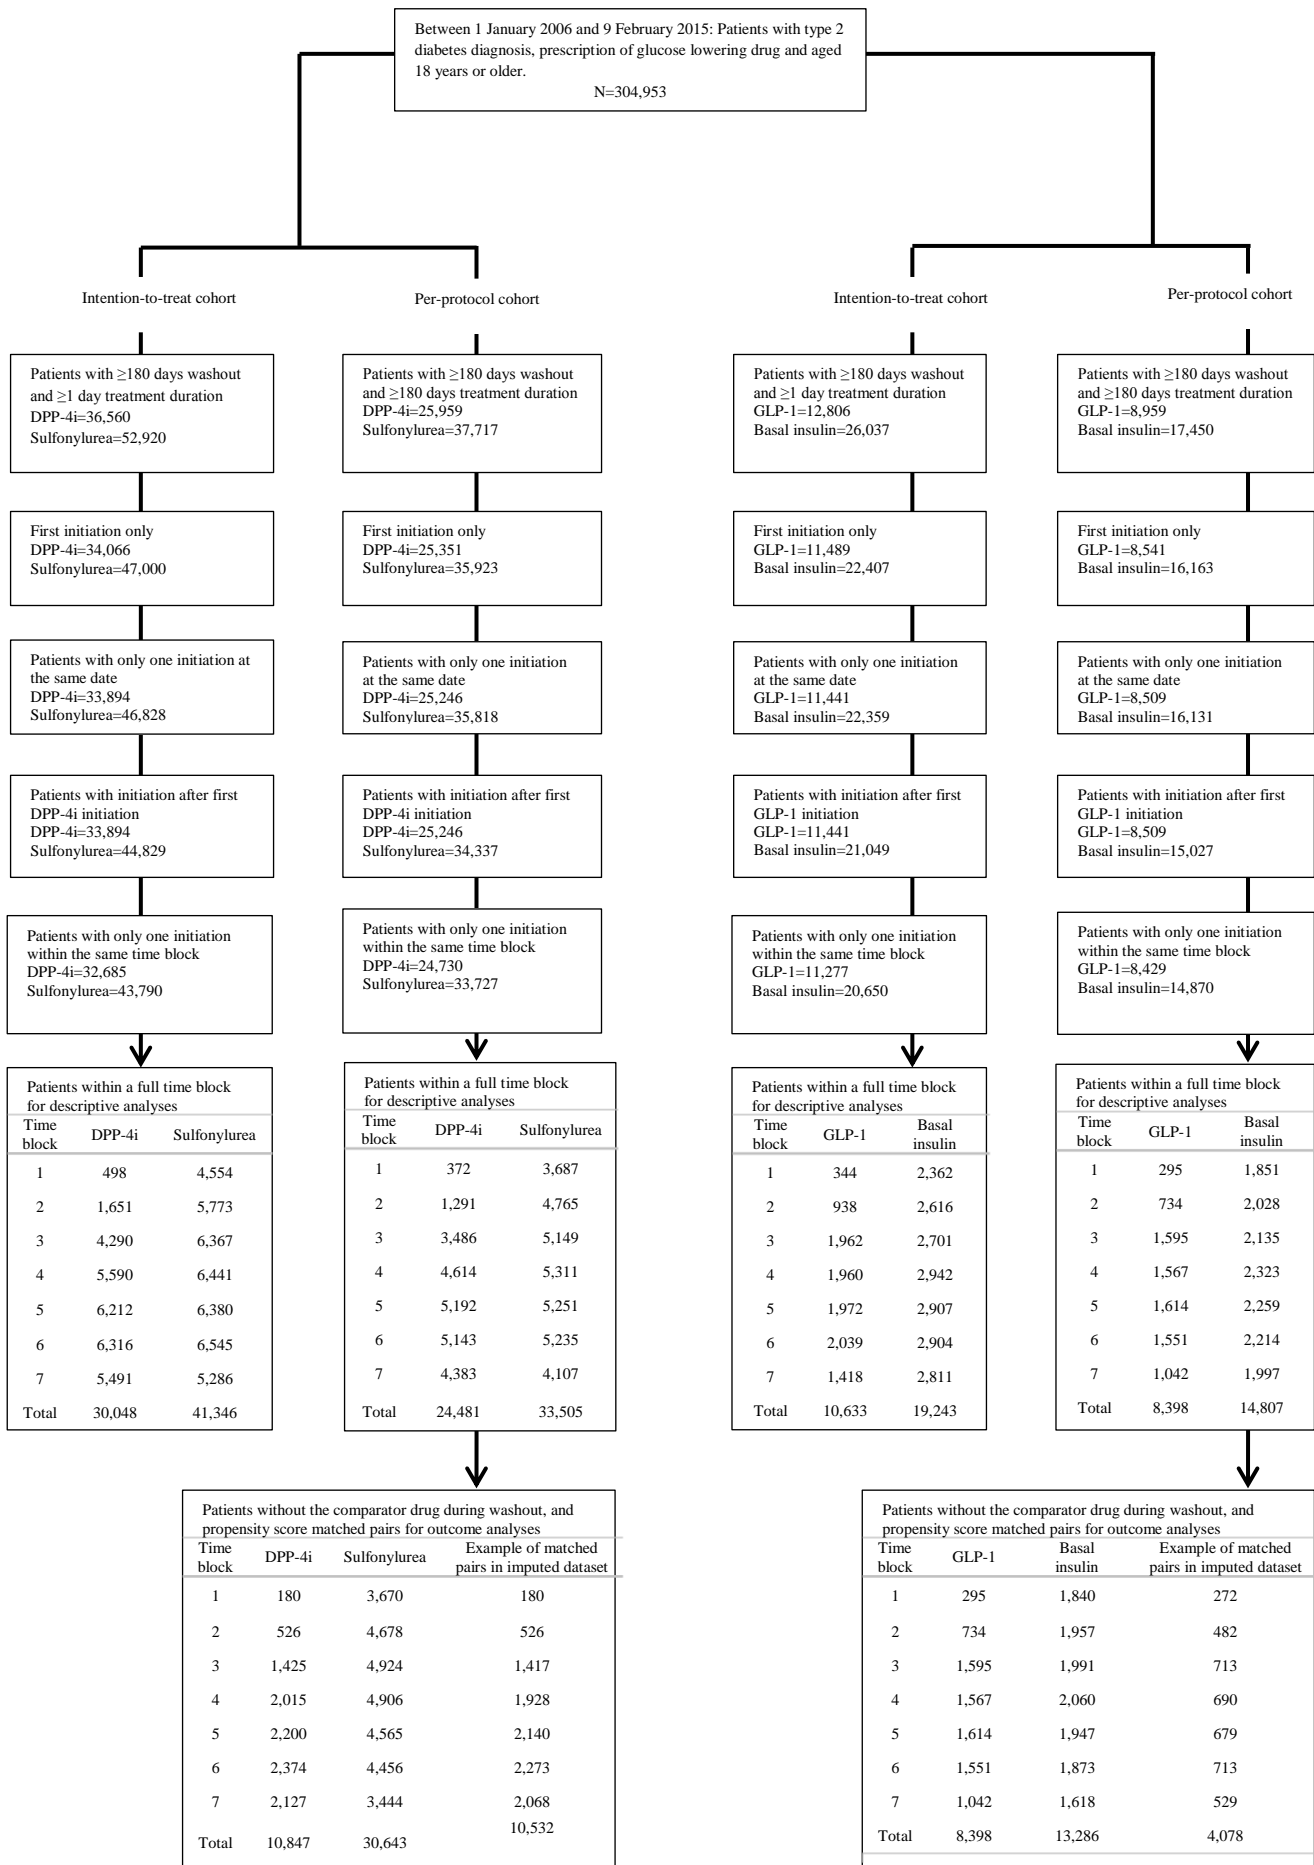

**Figure S2** Histograms of propensity score over time. Intention-to-treat and per-protocol cohorts of all identified initiators of GLP-1 and insulin, and DPP-4i and sulfonylurea, respectively. Blue: GLP-1 and DPP-4i initiators, respectively. Red: insulin and sulfonylurea initiators, respectively.

***GLP-1 vs. basal insulin, intention-to-treat cohort***

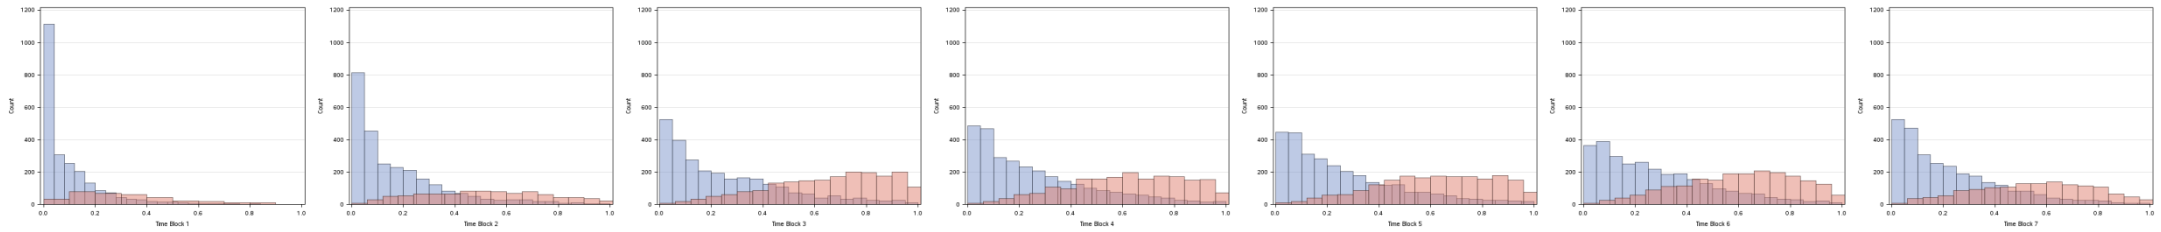

***GLP-1 vs. basal insulin, per-protocol cohort***

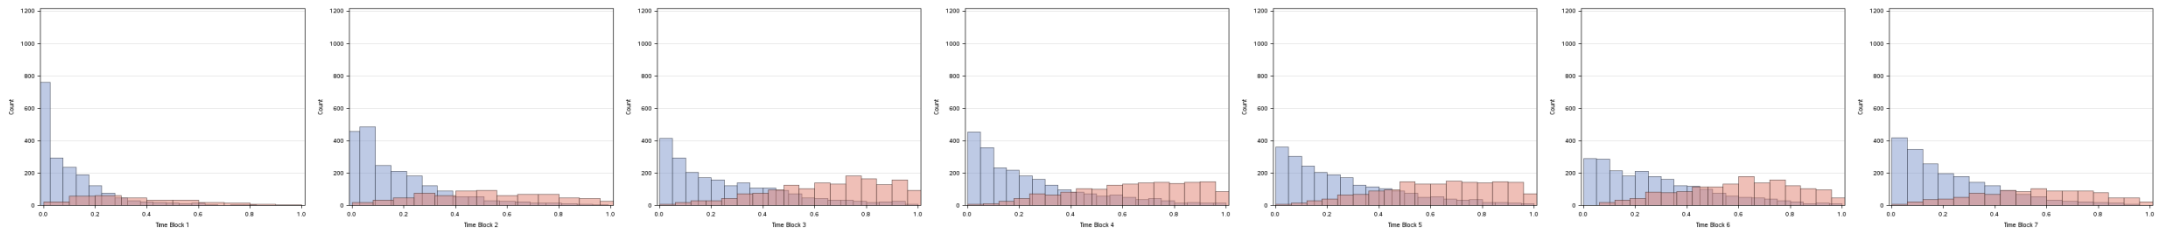

***DPP-4i vs. sulfonylurea, intention-to-treat cohort***

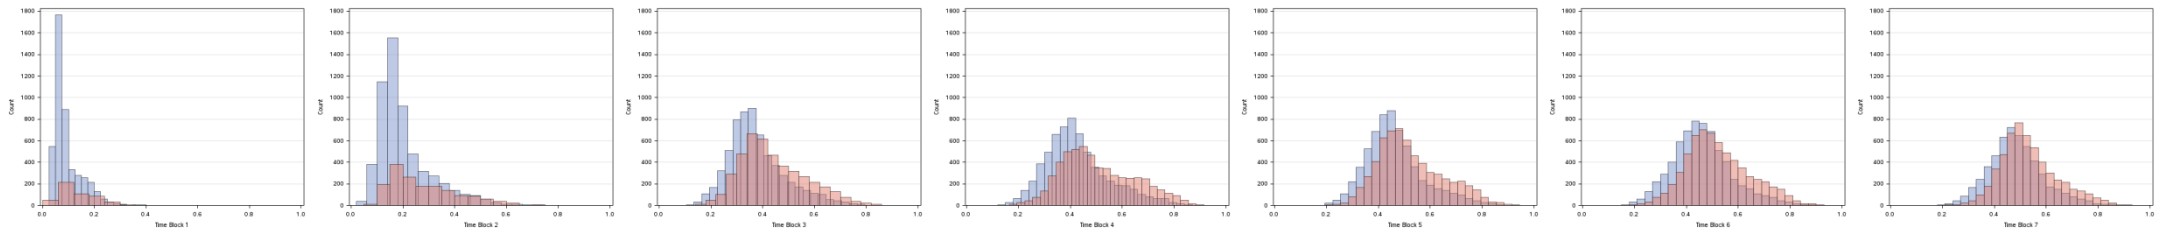

***DPP-4i vs. sulfonylurea, per-protocol cohort***

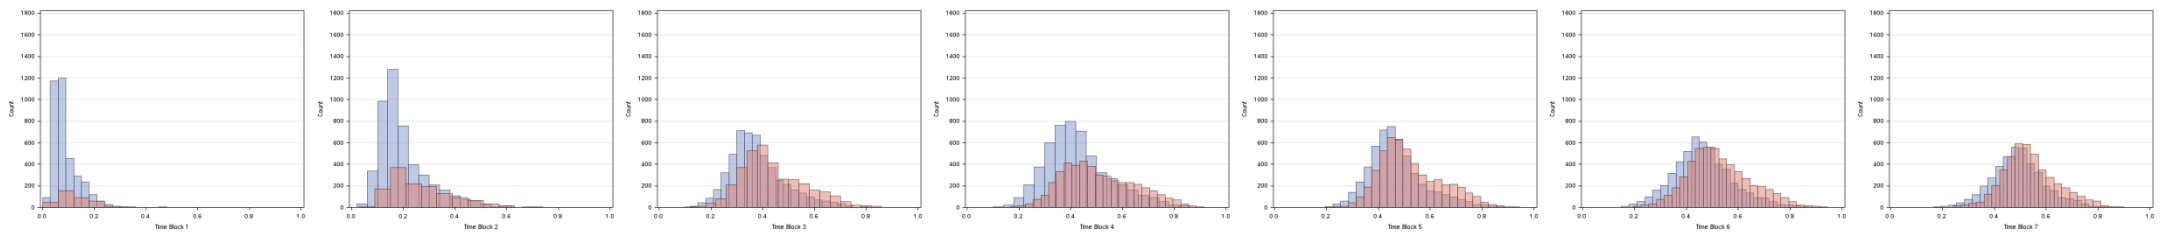

**Figure S3** Characteristics over time in GLP-1 versus basal insulin. Mean and 95%CI. Green dash line and triangle: GLP-1 initiators from intention-to-treat cohort. Blue solid line and triangle: GLP-1 initiators from per-protocol cohort. Purple dash line and square: insulin initiators from intention-to-treat cohort. Red solid line and square: insulin initiators from per-protocol cohort.

For GLP-1 initiators first a decrease and then an increase in HbA1c at index was observed, while a steady increase in HbA1c at index for insulin initiators were seen, however, still within a change in HbA1c of 0.5%. For both GLP-1 and insulin initiators an increase in use of DPP-4i during washout and a decrease in use of other oral glucose-lowering during washout were seen. For insulin initiators only an increase in use of sulfonylurea, GLP-1 and metformin during washout were seen. No clinically meaningful changes were observed for initiators of neither GLP-1 nor insulin in the other covariates.

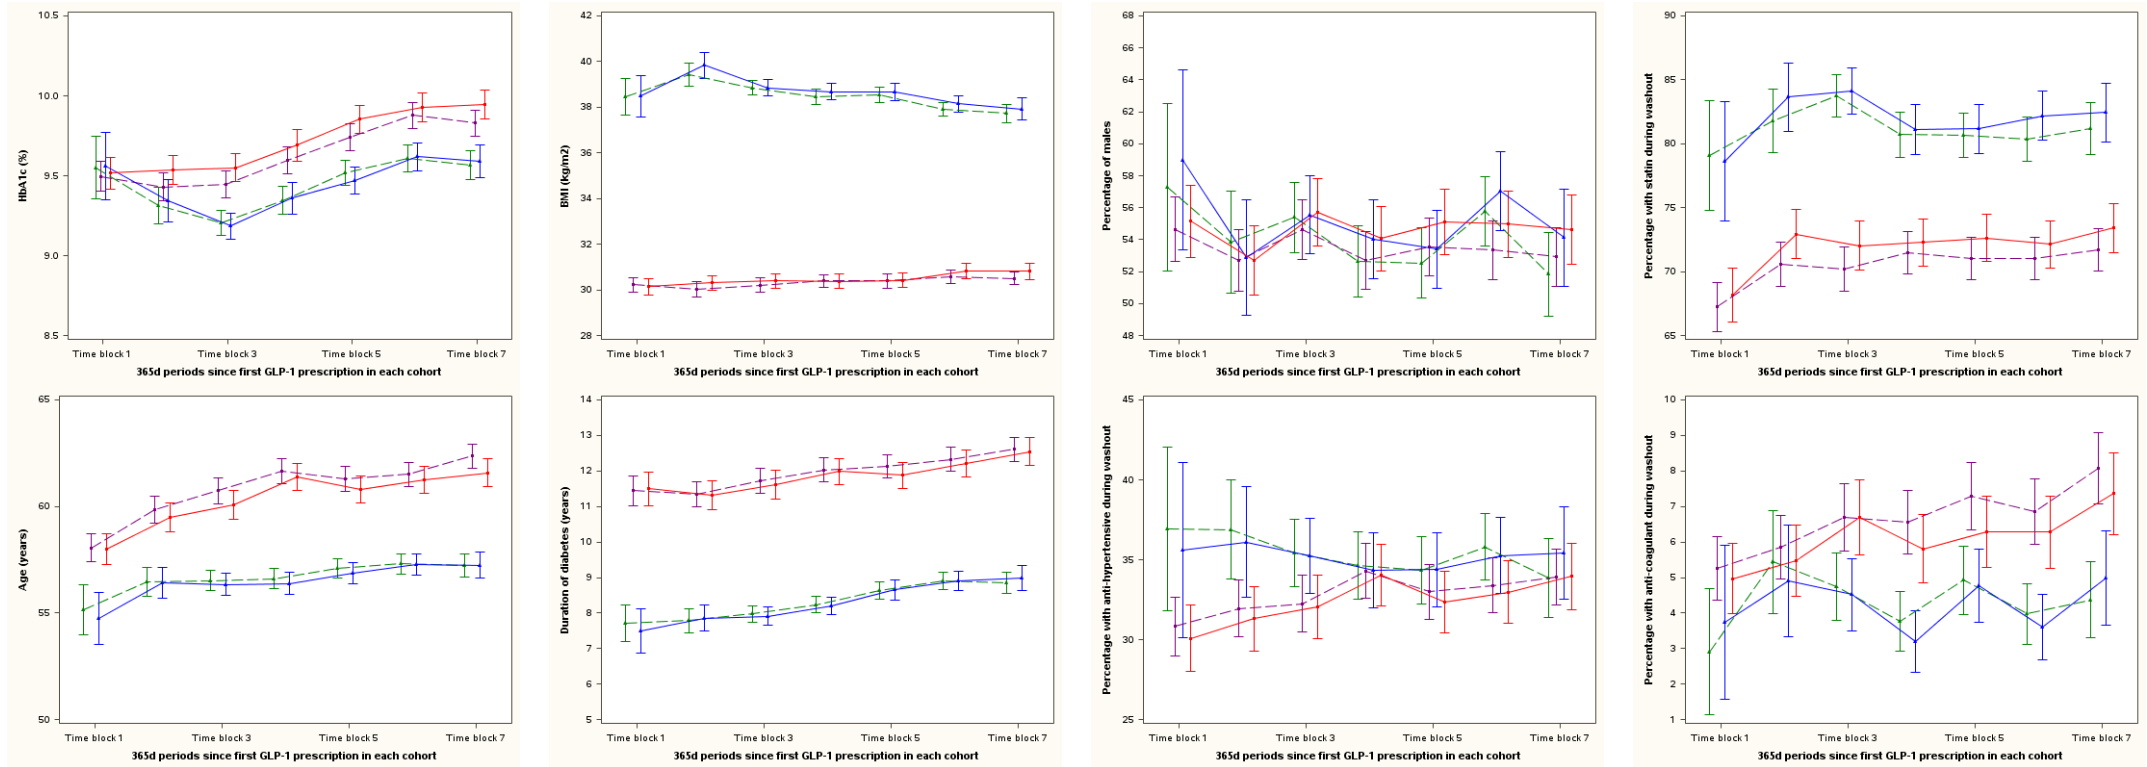

Figure S3 continued

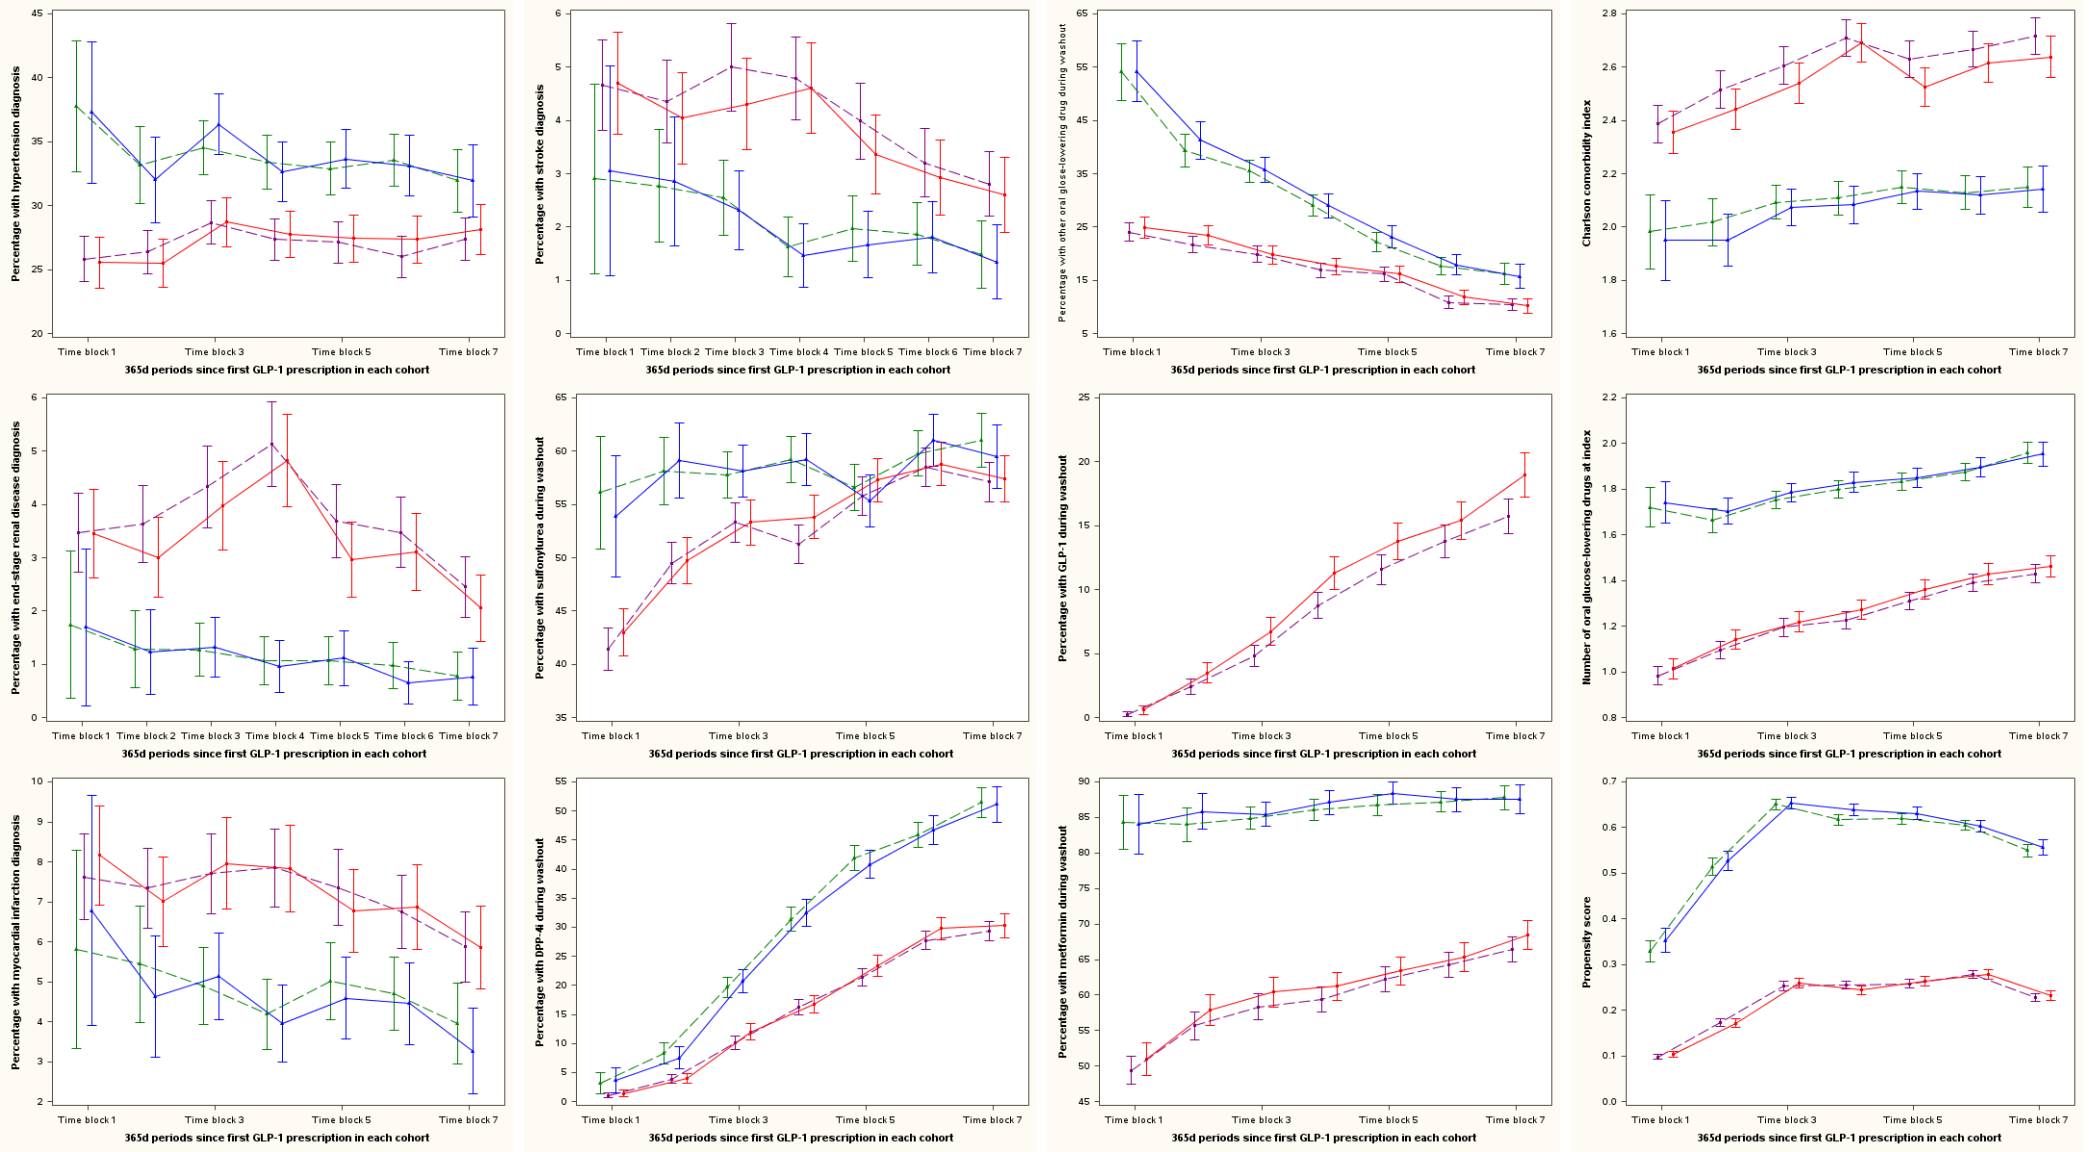

**Figure S4** Characteristics over time in DPP-4i versus sulfonylurea. Mean and 95%CI. Orange dash line and circle: DPP-4i initiators from intention-to-treat cohort. Cyan solid line and circle: DPP-4i initiators from per-protocol cohort. Pink dash line and diamond: Sulfonylurea initiators from intention-to-treat cohort. Dark blue solid line and diamond: Sulfonylurea initiators from per-protocol cohort.

An increase in duration of diabetes and use of metformin during washout, and a decrease in other oral glucose-lowering drugs during washout were seen among DPP-4i and sulfonylurea initiators. For sulfonylurea initiators only, a minor increase in HbA1c at index, and an increase in use of DPP-4i and GLP-1 during washout were seen. No clinically meaningful changes were observed for initiators of neither DPP4i nor sulfonylurea in the other covariates.

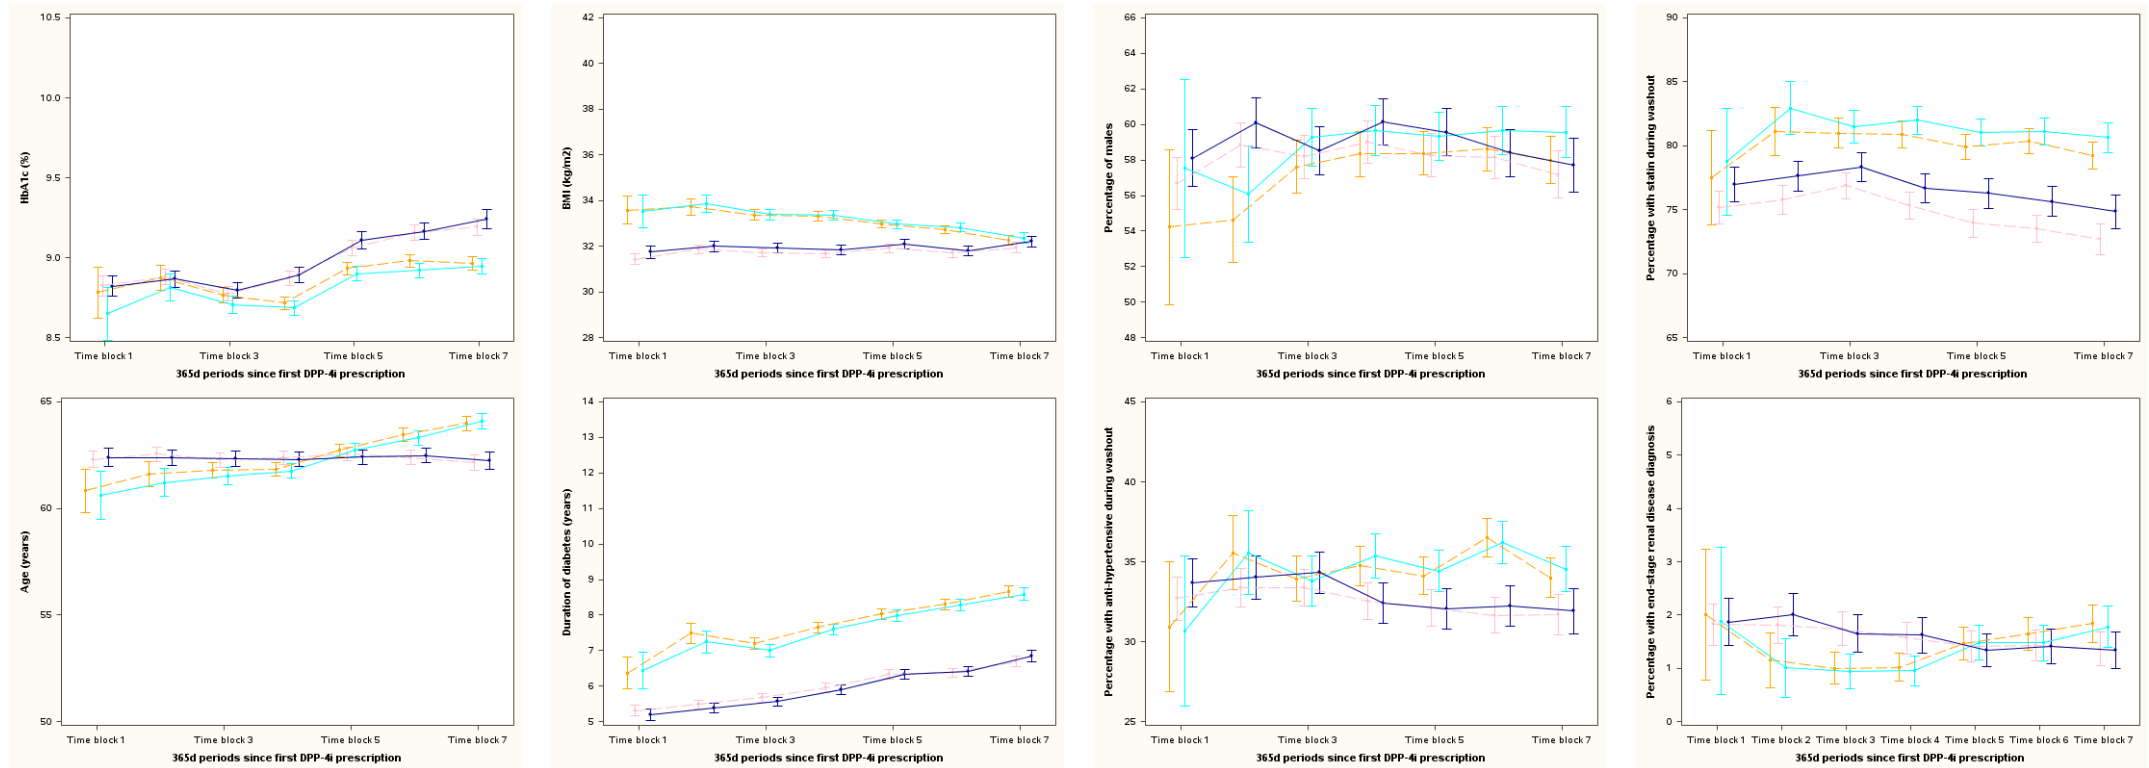

Figure S4 continued

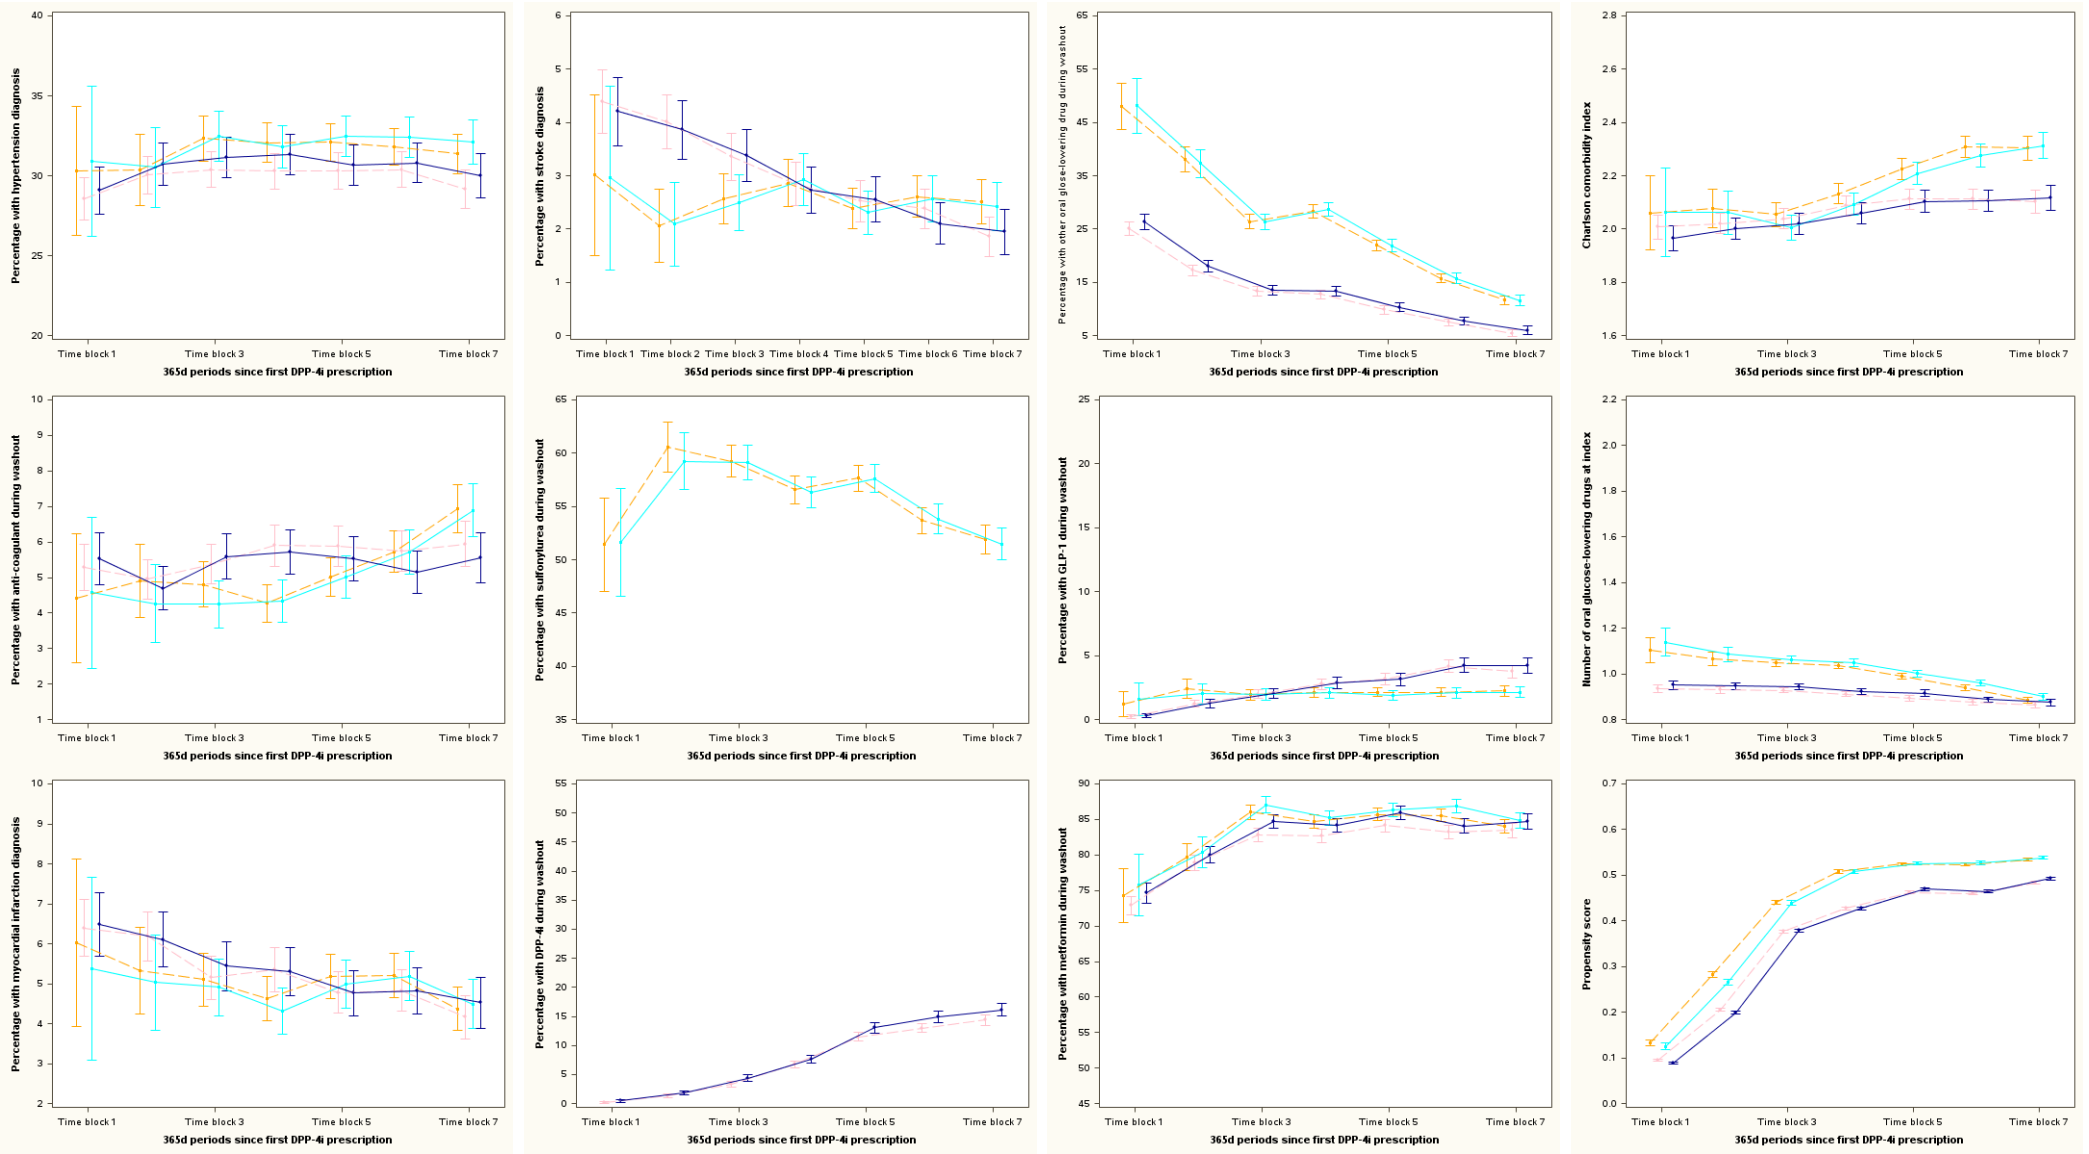

**Table S1** Standardized difference before and after matching in GLP-1 versus basal insulin initiators

| Time block             | BMI   | Diabetes duration | age    | HbA1c  | Charlson comorbidity index | Number of other oral glycoside-lowering drugs | males  | Any use during washout |        |                 |                                   |           |              |        | Any diagnosis of |                         |                       |        |
|------------------------|-------|-------------------|--------|--------|----------------------------|-----------------------------------------------|--------|------------------------|--------|-----------------|-----------------------------------|-----------|--------------|--------|------------------|-------------------------|-----------------------|--------|
|                        |       |                   |        |        |                            |                                               |        | Anti-hypertension      | statin | Anti-coagulants | Other oral glucose-lowering drugs | metformin | sulfonylurea | DPP-4i | Hypertension     | End-stage renal disease | Myocardial infarction | stroke |
| <b>BEFORE MATCHING</b> |       |                   |        |        |                            |                                               |        |                        |        |                 |                                   |           |              |        |                  |                         |                       |        |
| 1                      | 1.159 | -0.493            | -0.240 | 0.024  | -0.261                     | 0.806                                         | 0.077  | 0.117                  | 0.239  | -0.061          | 0.630                             | 0.755     | 0.219        | 0.147  | 0.255            | -0.111                  | -0.052                | -0.086 |
| 2                      | 1.323 | -0.461            | -0.236 | -0.107 | -0.316                     | 0.629                                         | 0.003  | 0.102                  | 0.262  | -0.026          | 0.389                             | 0.654     | 0.189        | 0.153  | 0.145            | -0.124                  | -0.101                | -0.065 |
| 3                      | 1.238 | -0.495            | -0.274 | -0.210 | -0.289                     | 0.605                                         | -0.003 | 0.068                  | 0.296  | -0.095          | 0.362                             | 0.587     | 0.097        | 0.238  | 0.164            | -0.167                  | -0.114                | -0.111 |
| 4                      | 1.221 | -0.523            | -0.378 | -0.184 | -0.375                     | 0.586                                         | 0.000  | 0.006                  | 0.210  | -0.127          | 0.271                             | 0.618     | 0.109        | 0.370  | 0.107            | -0.232                  | -0.165                | -0.184 |
| 5                      | 1.193 | -0.437            | -0.302 | -0.211 | -0.247                     | 0.506                                         | -0.034 | 0.043                  | 0.203  | -0.066          | 0.175                             | 0.612     | -0.039       | 0.379  | 0.135            | -0.131                  | -0.095                | -0.108 |
| 6                      | 1.057 | -0.443            | -0.309 | -0.174 | -0.316                     | 0.483                                         | 0.042  | 0.048                  | 0.242  | -0.123          | 0.170                             | 0.540     | 0.046        | 0.352  | 0.126            | -0.183                  | -0.105                | -0.074 |
| 7                      | 1.047 | -0.472            | -0.341 | -0.197 | -0.307                     | 0.509                                         | -0.010 | 0.031                  | 0.219  | -0.099          | 0.165                             | 0.472     | 0.043        | 0.436  | 0.083            | -0.109                  | -0.125                | -0.091 |
| <b>AFTER MATCHING</b>  |       |                   |        |        |                            |                                               |        |                        |        |                 |                                   |           |              |        |                  |                         |                       |        |
| 1                      | 0.003 | 0.041             | -0.008 | -0.022 | -0.012                     | -0.028                                        | 0.015  | 0.023                  | -0.011 | -0.028          | 0.020                             | -0.042    | -0.025       | -0.021 | 0.024            | 0.025                   | -0.017                | -0.019 |
| 2                      | 0.009 | 0.013             | -0.011 | -0.002 | -0.026                     | 0.008                                         | -0.004 | -0.003                 | -0.030 | -0.020          | -0.004                            | -0.002    | 0.007        | 0.014  | -0.015           | -0.022                  | 0.011                 | -0.023 |
| 3                      | 0.030 | 0.019             | 0.006  | 0.001  | -0.016                     | -0.034                                        | -0.014 | 0.011                  | -0.013 | -0.008          | -0.006                            | -0.019    | -0.024       | -0.014 | 0.005            | 0.021                   | 0.019                 | -0.020 |
| 4                      | 0.034 | 0.028             | 0.004  | -0.004 | 0.008                      | -0.047                                        | -0.011 | -0.010                 | -0.002 | 0.016           | -0.004                            | -0.023    | -0.039       | -0.017 | -0.002           | 0.013                   | -0.007                | -0.001 |
| 5                      | 0.021 | 0.032             | -0.023 | 0.010  | -0.010                     | -0.026                                        | -0.006 | 0.003                  | -0.026 | 0.010           | -0.005                            | -0.019    | -0.017       | -0.013 | 0.014            | -0.026                  | -0.006                | 0.005  |
| 6                      | 0.043 | 0.036             | 0.003  | 0.008  | 0.011                      | -0.044                                        | -0.015 | 0.009                  | -0.024 | -0.002          | -0.005                            | -0.031    | -0.015       | -0.020 | -0.005           | 0.014                   | -0.005                | -0.008 |
| 7                      | 0.038 | 0.051             | 0.014  | -0.019 | 0.025                      | -0.046                                        | 0.004  | -0.022                 | -0.013 | 0.015           | 0.003                             | -0.016    | -0.046       | -0.020 | -0.016           | 0.013                   | 0.022                 | -0.012 |



**Table S2** Standardized difference before and after matching DPP-4i versus sulfonylurea initiators.

| Time block             | BMI    | Diabetes duration | Age    | HbA1c  | Charlson comorbidity index | Number of other oral glucose-lowering drugs | Males  | Any use during washout |        |                 |                                   |           | Any diagnosis of |                         |                       |        |
|------------------------|--------|-------------------|--------|--------|----------------------------|---------------------------------------------|--------|------------------------|--------|-----------------|-----------------------------------|-----------|------------------|-------------------------|-----------------------|--------|
|                        |        |                   |        |        |                            |                                             |        | Anti-hypertension      | statin | Anti-coagulants | Other oral glucose-lowering drugs | metformin | Hypertension     | End-stage renal disease | Myocardial infarction | stroke |
| <b>BEFORE MATCHING</b> |        |                   |        |        |                            |                                             |        |                        |        |                 |                                   |           |                  |                         |                       |        |
| 1                      | 0.267  | 0.250             | -0.147 | -0.107 | 0.062                      | 0.321                                       | -0.012 | -0.065                 | 0.044  | -0.044          | 0.464                             | 0.026     | 0.040            | 0.001                   | -0.047                | -0.067 |
| 2                      | 0.269  | 0.350             | -0.094 | -0.034 | 0.042                      | 0.248                                       | -0.081 | 0.032                  | 0.134  | -0.021          | 0.440                             | 0.008     | -0.004           | -0.083                  | -0.047                | -0.104 |
| 3                      | 0.226  | 0.290             | -0.064 | -0.057 | -0.011                     | 0.231                                       | 0.015  | -0.010                 | 0.078  | -0.062          | 0.324                             | 0.068     | 0.028            | -0.062                  | -0.024                | -0.052 |
| 4                      | 0.241  | 0.330             | -0.044 | -0.128 | 0.022                      | 0.250                                       | -0.010 | 0.062                  | 0.131  | -0.064          | 0.384                             | 0.029     | 0.010            | -0.059                  | -0.047                | 0.012  |
| 5                      | 0.131  | 0.309             | 0.028  | -0.125 | 0.069                      | 0.171                                       | -0.005 | 0.050                  | 0.117  | -0.023          | 0.319                             | 0.011     | 0.039            | 0.013                   | 0.011                 | -0.016 |
| 6                      | 0.163  | 0.345             | 0.066  | -0.147 | 0.109                      | 0.152                                       | 0.026  | 0.084                  | 0.133  | 0.025           | 0.248                             | 0.080     | 0.034            | 0.005                   | 0.017                 | 0.031  |
| 7                      | 0.016  | 0.307             | 0.147  | -0.180 | 0.122                      | 0.055                                       | 0.038  | 0.056                  | 0.140  | 0.055           | 0.198                             | 0.003     | 0.046            | 0.036                   | -0.002                | 0.032  |
| <b>AFTER MATCHING</b>  |        |                   |        |        |                            |                                             |        |                        |        |                 |                                   |           |                  |                         |                       |        |
| 1                      | -0.042 | -0.038            | 0.009  | -0.033 | -0.002                     | 0.025                                       | 0.013  | -0.010                 | 0.043  | -0.030          | 0.026                             | -0.015    | 0.009            | -0.005                  | 0.022                 | -0.050 |
| 2                      | 0.024  | -0.012            | -0.016 | 0.002  | -0.016                     | -0.015                                      | -0.025 | -0.004                 | -0.011 | 0.025           | -0.001                            | -0.028    | -0.016           | 0.034                   | 0.010                 | 0.004  |
| 3                      | 0.001  | -0.002            | 0.021  | -0.010 | 0.032                      | 0.008                                       | -0.016 | 0.002                  | -0.018 | 0.009           | 0.026                             | -0.023    | 0.001            | -0.029                  | 0.004                 | 0.007  |
| 4                      | -0.005 | 0.008             | 0.018  | 0.003  | 0.021                      | 0.002                                       | 0.000  | 0.002                  | -0.009 | 0.008           | 0.021                             | -0.027    | -0.004           | 0.010                   | 0.001                 | 0.009  |
| 5                      | 0.004  | 0.001             | 0.009  | 0.003  | 0.007                      | 0.006                                       | 0.001  | 0.000                  | -0.015 | 0.009           | 0.025                             | -0.018    | -0.004           | 0.006                   | 0.002                 | -0.002 |
| 6                      | 0.003  | 0.006             | -0.005 | 0.006  | 0.007                      | 0.004                                       | -0.003 | 0.002                  | -0.002 | 0.001           | 0.016                             | -0.006    | 0.000            | -0.006                  | 0.000                 | -0.004 |
| 7                      | 0.010  | 0.012             | -0.007 | 0.008  | 0.010                      | 0.011                                       | 0.008  | 0.004                  | -0.003 | 0.001           | 0.043                             | -0.028    | 0.003            | 0.007                   | -0.015                | 0.002  |
